# Supplementary material for: Deoxynivalenol damages the intestinal barrier and biota of the broiler chickens
Source: PubMed Central journal article supplement (PMC9377127; doi:10.1186/s12917-022-03392-4), 2022-08-15

Fig.S1 The original blots of Fig. 2B.

Duodenum:

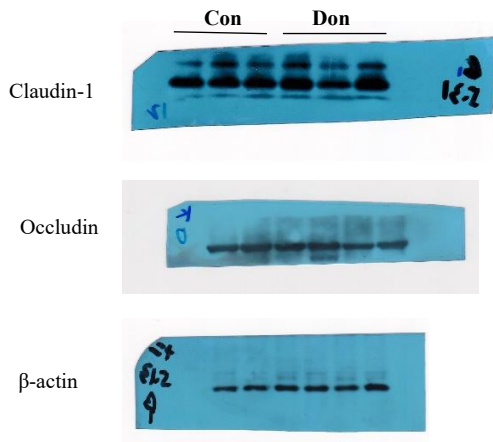

Jejunum:

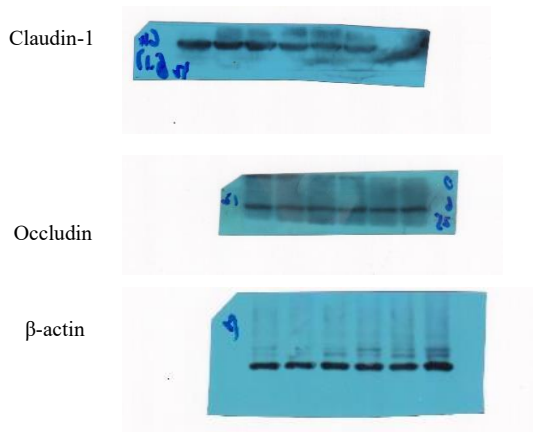

Ileum:

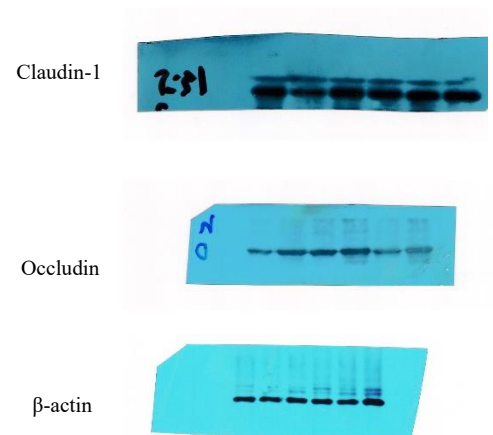

Supplement: 12917_2022_3392_MOESM1_ESM.pdf [file 12917_2022_3392_MOESM1_ESM.pdf]
